# Supplementary material
Source: PubMed Central journal article supplement (PMC5775038)
Supplement: NIHMS924266-supplement-Supporting_Information.pdf [file NIHMS924266-supplement-Supporting_Information.pdf]

## Supporting Information

### **Yield Improvement of the Anti-MRSA Antibiotics WAP-8294A by CRISPR/dCas9 Combined with Refactoring Self-protection Genes in *Lysobacter enzymogenes* OH11**

Lingjun Yu,<sup>†,‡</sup> Wei Su,<sup>‡</sup> Paul D. Fey,<sup>‡</sup> Fengquan Liu,<sup>\*,†</sup> Liangcheng Du<sup>\*,‡</sup>

<sup>†</sup>Institute of Plant Protection, Jiangsu Academy of Agricultural Sciences, Nanjing, 210014, China

<sup>‡</sup>Department of Chemistry, University of Nebraska-Lincoln, Lincoln, Nebraska, 68588, USA

<sup>‡</sup>Department of Pathology and Microbiology, University of Nebraska Medical Center, Omaha, Nebraska, 68198-5900, USA

\*Corresponding Authors

Liangcheng Du, Email: [ldu3@unl.edu](mailto:ldu3@unl.edu)

Fengquan Liu, Email: [fqliu20011@sina.com](mailto:fqliu20011@sina.com)

**Table S1.** Bacterial strains and plasmids used in this study

| Bacterial strains/plasmids               | Relevant characteristics <sup>a</sup>                                                                                                       | Source/references     |
|------------------------------------------|---------------------------------------------------------------------------------------------------------------------------------------------|-----------------------|
| <b><i>Lysobacterenzymogenes</i></b>      |                                                                                                                                             |                       |
| OH11                                     | Wild-type, Km <sup>r</sup>                                                                                                                  | 26                    |
| dCas9-ω1                                 | OH11 containing vector pB-dCas9-ω-cr1                                                                                                       | This study            |
| dCas9-ω2                                 | OH11 containing vector pB-dCas9-ω-cr2                                                                                                       | This study            |
| dCas9-ω3                                 | OH11 containing vector pB-dCas9-ω-cr3                                                                                                       | This study            |
| dCas9-ω4                                 | OH11 containing vector pB-dCas9-ω-cr4                                                                                                       | This study            |
| dCas9-ω5                                 | OH11 containing vector pB-dCas9-ω-cr5                                                                                                       | This study            |
| dCas9-ω6                                 | OH11 containing vector pB-dCas9-ω-cr6                                                                                                       | This study            |
| dCas9-ω3/refactored                      | Plasmid pHmgA-P::WAP integrated into the genome of dCas9-ω3                                                                                 | This study            |
| WT/refactored                            | Plasmid pHmgA-P::WAP integrated into the genome of OH11                                                                                     | This study            |
| <b>Other bacteria</b>                    |                                                                                                                                             |                       |
| <i>Bacillus subtilis</i>                 | Indicator strain of WAP-8294A                                                                                                               | 3                     |
| <i>Escherichia coli</i> strain XL-1 Blue | Host strain for molecular cloning                                                                                                           | Laboratory collection |
| <b>Plasmids</b>                          |                                                                                                                                             |                       |
| pBBR1-MCS5                               | Broad-host-range vector with <i>Plac</i> promoter, Gm <sup>r</sup>                                                                          | 27                    |
| pWJ66                                    | Plasmid contains crRNA and <i>dCas9</i>                                                                                                     | Addgene               |
| pB-dCas9-ω-cr1                           | pBBR1-MCS5 cloned with dCas9, ω subunit and cr-spacer1-cr, Gm <sup>r</sup>                                                                  | This study            |
| pB-dCas9-ω-cr2                           | pBBR1-MCS5 cloned with dCas9, ω subunit and cr-spacer2-cr, Gm <sup>r</sup>                                                                  | This study            |
| pB-dCas9-ω-cr3                           | pBBR1-MCS5 cloned with dCas9, ω subunit and cr-spacer3-cr, Gm <sup>r</sup>                                                                  | This study            |
| pB-dCas9-ω-cr4                           | pBBR1-MCS5 cloned with dCas9, ω subunit and cr-spacer4-cr, Gm <sup>r</sup>                                                                  | This study            |
| pB-dCas9-ω-cr5                           | pBBR1-MCS5 cloned with dCas9, ω subunit and cr-spacer5-cr, Gm <sup>r</sup>                                                                  | This study            |
| pB-dCas9-ω-cr6                           | pBBR1-MCS5 cloned with dCas9, ω subunit and cr-spacer6-cr, Gm <sup>r</sup>                                                                  | This study            |
| pHmgA-P                                  | pJQ200SK containing the HmgA fragment and P <sub>HSAF</sub> promoter, Gm <sup>r</sup>                                                       | 22                    |
| pHmgA-P::WAP                             | pHmgA-P containing the genes <i>orf9</i> , <i>orf10</i> , <i>orf7</i> and <i>orf6</i> under the P <sub>HSAF</sub> promoter, Gm <sup>r</sup> | This study            |

<sup>a</sup>Km<sup>r</sup>, kanamycin resistant; Gm<sup>r</sup>, gentamicin resistant

**Table S2.** Primers used in this study

| Primers          | Sequence(5'-3')                                |
|------------------|------------------------------------------------|
| Tra-dCas9-F-ApaI | AAAGGGCCCAAAAAAAGCACCGACTCGGTG                 |
| Tracr-Cas9-R     | TACGTGACAGCTGCGTCACCTCCTAGCTG                  |
| ωsub-F           | TTAGTCGACGCCCGCATCACCGTCGAA                    |
| ωsub-R           | TATCTGCAGTCAGTCGTCGCCCTTGGGA                   |
| Cr-up-F          | TCGCTGCAGTACTCTTAATAAATGCAGT                   |
| Cr-R-XbaI        | GGCTCTAGAATCAAGCTTATCGATGGT                    |
| Spacer1-up-R     | GCGCATTTACCCGAAATTTACGGGTTATGGGTTTTGGGACCATTG  |
| Spacer2-up-R     | CAAAGCGCGTCACAACCCGCGATGACATTCGGTTTTGGGACCATTG |
| Spacer3-up-R     | CGATGACATTCGTCATGCGGACGATGGTGAGTTTTGGGACCATTG  |
| Spacer4-up-R     | CGACCACCTGTCCGTCCTTTCCGCATAACCCGTTTTGGGACCATTG |
| Spacer5-up-R     | CCTGTCCGTCCTTTCCGCATAACCCGTAAATGTTTTGGGACCATTG |
| Spacer6-up-R     | TAACCCGTAAATTTCCGGTGAAATGCGCCGGGTTTTGGGACCATTG |
| Spacer1-down-F   | CCATAACCCGTAAATTTCCGGTGAAATGCGCGTTTTAGAGCTATGC |
| Spacer2-down-F   | CGAATGTCATCGCGGTTGTGACGCGCTTTGGTTTTAGAGCTATGC  |
| Spacer3-down-F   | TCACCATCGTCCGCATGACGAATGTCATCGGTTTTAGAGCTATGC  |
| Spacer4-down-F   | GGGTTATGGCGAAAGACGGACAGGTGGTTCGGTTTTAGAGCTATGC |
| Spacer5-down-F   | ATTTACGGGTTATGGCGAAAGACGGACAGGTTTTAGAGCTATGC   |
| Spacer6-down-F   | CCGGCGCATTTACCCGAAATTTACGGGTTAGTTTTAGAGCTATGC  |
| WAPS1-real-F     | AACATCAGGCCAGCTTGTTG                           |
| WAPS1-real-R     | AGGGTCTGAAACTCGGATT                            |
| WAPS2-real-F     | TACCACCTGCTCGGCTATTC                           |
| WAPS2-real-R     | ATGTTCTGCAGGAAGCCTTG                           |
| ORF5-real-F      | GACAACCCGGAATCATTGT                            |
| ORF5-real-R      | GTCGATCAGGTGCTTGGTCT                           |
| OH11-16S-real-F  | GTGCGTAGGTGGTTTGTTAA                           |
| OH11-16S-real-R  | ATCTAATCCTGTTTGCTCCC                           |
| ORF6-up          | CCGCTCGAGCTCACCCGCTTCGCAA                      |
| ORF6-down        | CCGCTCGAGGCATCGCATTGGCG                        |
| ORF7-up          | CGCGGATCCCATCAAGGAGGTTGACC                     |
| ORF7-down        | CCGCTCGAGTCAGCCCGTGGTCAACAC                    |
| ORF9-10-up       | CGCGGATCCATGTCCCGAACCGTATTG                    |
| ORF9-10-down     | CGCGGATCCTCAACGGTTCAGGCCTT                     |
| ORF6-VF1         | TTGGGGTAGTGAAGACGCA                            |
| ORF6-VR1         | GTGTTGACCACGGGCTGA                             |
| ORF6-VF2         | GCCAGGGTTTTCCCAGTC                             |
| ORF6-VR2         | CCTGTTTCGCACAAGCCTG                            |
| ORF6-real-F      | CGCCTTCAACCTGACCCA                             |
| ORF6-real-R      | GACCCGTGTCGTTGTTGG                             |
| ORF7-real-F      | GTTATCGCCTGGTTCGTTGG                           |
| ORF7-real-R      | GTCAGCGGCTTGTGCAGA                             |
| ORF9-real-F      | CCTTGTTCCCTGGAGCACG                            |

---

|              |                    |
|--------------|--------------------|
| ORF9-real-R  | TTCGTCCAGGCGGATGTC |
| ORF10-real-F | CCCGATTACGAGCGCTAT |
| ORF10-real-R | GCCGCCACCAGTAGTTGA |
| Gm-F         | GCAGCAACGATGTTACGC |
| Gm-R         | CTTCCCGTATGCCCAACT |

---

**Table S3.** Test of WAP-8294A2 efficacy

| <b>Organism</b>                   | <b>Reference Number</b> | <b>Features<sup>a</sup></b> | <b>MIC (µg/ml)</b> |
|-----------------------------------|-------------------------|-----------------------------|--------------------|
| <i>Streptococcus pyogenes</i>     | B66-13                  |                             | 51.2               |
| <i>Streptococcus pyogenes</i>     | ATCC 12384              |                             | 25.6               |
| <i>Streptococcus pyogenes</i>     | A-B687-12               |                             | 51.2               |
| <i>Streptococcus pyogenes</i>     | A-W22962                |                             | 25.6               |
| <i>Streptococcus pyogenes</i>     | A-W57924                |                             | 25.6               |
| <i>Streptococcus agalactiae</i>   | B223-12                 |                             | >51.2              |
| <i>Streptococcus agalactiae</i>   | B195-13                 |                             | >51.2              |
| <i>Streptococcus agalactiae</i>   | B184-13                 |                             | >51.2              |
| <i>Streptococcus agalactiae</i>   | ATCC 12386              |                             | >51.2              |
| <i>Streptococcus agalactiae</i>   | ATCC 13813              |                             | >51.2              |
| <i>Streptococcus pneumoniae</i>   | B343-13                 |                             | >51.2              |
| <i>Streptococcus pneumoniae</i>   | B396-13                 |                             | >51.2              |
| <i>Streptococcus pneumoniae</i>   | B419-13                 |                             | >51.2              |
| <i>Streptococcus pneumoniae</i>   | B454-13                 |                             | >51.2              |
| <i>Streptococcus pneumoniae</i>   | B500-13                 |                             | >51.2              |
| <i>Enterococcus faecalis</i>      | B161-13                 |                             | 51.2               |
| <i>Enterococcus faecalis</i>      | B103-13                 |                             | 51.2               |
| <i>Enterococcus faecalis</i>      | B114-13                 |                             | 51.2               |
| <i>Enterococcus faecalis</i>      | B126-13                 |                             | 51.2               |
| <i>Enterococcus faecalis</i>      | ATCC 29212              |                             | 51.2               |
| <i>Enterococcus faecium</i>       | ATCC 51559              | VRE                         | 51.2               |
| <i>Enterococcus faecium</i>       | ATCC 51299              | VRE                         | 51.2               |
| <i>Enterococcus faecium</i>       | V-18-13                 | VRE                         | 25.6               |
| <i>Enterococcus faecium</i>       | V-19-13                 | VRE                         | 25.6               |
| <i>Enterococcus faecium</i>       | V20-13                  | VRE                         | 51.2               |
| <i>Enterococcus faecium</i>       | V22-13                  | VRE                         | 51.2               |
| <i>Enterococcus faecium</i>       | E16-69                  | Dapto R                     | 51.2               |
| <i>Enterococcus faecium</i>       | E16-70                  | Dapto R                     | 51.2               |
| <i>Enterococcus faecium</i>       | E16-71                  | Dapto R                     | 25.6               |
| <i>Enterococcus faecium</i>       | E17-21                  | Dapto R                     | 25.6               |
| <i>Enterococcus faecium</i>       | E17-38                  | Dapto R                     | 51.2               |
| <i>Staphylococcus aureus</i>      | ATCC BAA-977            |                             | 0.4                |
| <i>Staphylococcus aureus</i>      | ATCC-43300              | MRSA                        | 0.4                |
| <i>Staphylococcus aureus</i>      | ATCC 25923              | MSSA                        | 0.4                |
| <i>Staphylococcus aureus</i>      | B163-13                 | MRSA                        | 0.4                |
| <i>Staphylococcus aureus</i>      | B176-13                 | MRSA                        | 0.2                |
| <i>Staphylococcus aureus</i>      | M517-12                 | Dapto R                     | 0.4                |
| <i>Staphylococcus aureus</i>      | B214-13                 | Dapto R                     | 0.8                |
| <i>Staphylococcus aureus</i>      | B215-13                 | Dapto R                     | 0.8                |
| <i>Staphylococcus aureus</i>      | M305-11                 | Dapto R                     | 0.8                |
| <i>Staphylococcus aureus</i>      | M236-11                 | Dapto R                     | 0.4                |
| <i>Staphylococcus epidermidis</i> | ATCC 14990              |                             | 1.6                |

|                                   |           |       |
|-----------------------------------|-----------|-------|
| <i>Staphylococcus epidermidis</i> | B199-13   | 0.8   |
| <i>Staphylococcus epidermidis</i> | B168-13   | 1.6   |
| <i>Staphylococcus epidermidis</i> | B166-13   | 1.6   |
| <i>Staphylococcus epidermidis</i> | B150-13   | 1.6   |
| <i>Listeria monocytogenes</i>     | NPHL-2354 | 3.2   |
| <i>Listeria monocytogenes</i>     | NPHL-5606 | 6.4   |
| <i>Listeria monocytogenes</i>     | NPHL-2326 | 6.4   |
| <i>Listeria monocytogenes</i>     | NPHL-2362 | 6.4   |
| <i>Listeria monocytogenes</i>     | NPHL-2358 | 6.4   |
| <i>Bacillus species</i>           | NPHL-6420 | 0.4   |
| <i>Bacillus cereus</i>            | NPHL-2810 | >12.8 |
| <i>Bacillus cereus</i>            | NPHL-2990 | >12.8 |

---

<sup>a</sup>VRE = vancomycin-resistant *Enterococci*

Dapto R = Daptomycin-resistant isolate

MRSA=Methicillin-resistant *Staphylococcus aureus*

MSSA = Methicillin-susceptible *Staphylococcus aureus*

**Table S4.** Statistics of the transcription level of *WAPS1*, *WAPS2* and *orf5* in dCas9- $\omega$  strains.

Tukey Test was used to analyze the data.

| Strains  | <i>WAPS1</i> |                                      |                                  | <i>WAPS2</i> |                                 |                                  | <i>orf5</i> |                                 |                                  |
|----------|--------------|--------------------------------------|----------------------------------|--------------|---------------------------------|----------------------------------|-------------|---------------------------------|----------------------------------|
|          | Mean         | 5% SL <sup><math>\alpha</math></sup> | 1% SL                            | Mean         | 5% SL                           | 1% SL                            | Mean        | 5% SL                           | 1% SL                            |
| WT       | 1.0000       | c <sup><math>\beta</math></sup>      | B <sup><math>\gamma</math></sup> | 1.0000       | c <sup><math>\beta</math></sup> | C <sup><math>\gamma</math></sup> | 1.0000      | b <sup><math>\beta</math></sup> | B <sup><math>\gamma</math></sup> |
| Spacer 2 | 1.7270       | c                                    | B                                | 1.9830       | c                               | BC                               | 4.0920      | b                               | B                                |
| Spacer 3 | 5.1820       | a                                    | A                                | 8.8037       | a                               | A                                | 48.8467     | a                               | A                                |
| Spacer 4 | 1.4863       | c                                    | B                                | 1.7940       | c                               | BC                               | 1.5723      | b                               | B                                |
| Spacer 5 | 3.8323       | b                                    | A                                | 4.0633       | b                               | B                                | 4.1367      | b                               | B                                |
| Spacer 6 | 0.5563       | c                                    | B                                | 0.6533       | c                               | C                                | 0.9297      | b                               | B                                |

<sup>$\alpha$</sup> Significance Level;  <sup>$\beta$</sup> the lowercase letters indicate the  $P$  value  $< 0.05$  between WT and the other strains, when their letters are different from that of WT;  <sup>$\gamma$</sup> the capital letters indicate the  $P$  value  $< 0.01$  between WT and the other strains, when their letters are different from that of WT.

**Table S5.** Statistics of the transcription level of *orf9*, *orf10*, *orf7* and *orf6* in various *Lysobacter* strains. Tukey Test was used to analyze the data.

| Strains                    | <i>orf9</i> |                    |                | <i>orf10</i> |                |                | <i>orf7</i> |                |                | <i>orf6</i> |                 |                |
|----------------------------|-------------|--------------------|----------------|--------------|----------------|----------------|-------------|----------------|----------------|-------------|-----------------|----------------|
|                            | Mean        | 5% SL <sup>α</sup> | 1% SL          | Mean         | 5% SL          | 1% SL          | Mean        | 5% SL          | 1% SL          | Mean        | 5% SL           | 1% SL          |
| WT<br>24h                  | 1.0000      | c <sup>β</sup>     | C <sup>γ</sup> | 1.0000       | c <sup>β</sup> | C <sup>γ</sup> | 1.0000      | c <sup>β</sup> | C <sup>γ</sup> | 1.0000      | bc <sup>β</sup> | B <sup>γ</sup> |
| dCas9-ω3<br>24h            | 0.8283      | c                  | C              | 0.5833       | c              | C              | 1.3803      | c              | C              | 0.7433      | bc              | B              |
| dCas9-ω3/refactored<br>24h | 65.7063     | a                  | A              | 28.4610      | a              | A              | 20.4257     | a              | A              | 21.4303     | a               | A              |
| WT<br>48h                  | 4.0993      | c                  | C              | 1.1160       | c              | C              | 1.7113      | c              | C              | 0.8863      | c               | B              |
| dCas9-ω3<br>48h            | 3.5673      | c                  | C              | 0.6007       | c              | C              | 2.2597      | c              | C              | 0.3630      | c               | B              |
| dCas9-ω3/refactored<br>48h | 44.1810     | b                  | B              | 9.4087       | b              | B              | 15.5280     | b              | B              | 8.3870      | b               | B              |

<sup>α</sup>Significance Level; <sup>β</sup>the lowercase letters indicate the *P* value < 0.05 between WT and the other strains, when their letters are different from that of WT; <sup>γ</sup>the capital letters indicate the *P* value < 0.01 between WT and the other strains, when their letters are different from that of WT.



**Table S6.** Statistics of the LC-MS peak areas of WAP-8294A compounds in various *Lysobacter* strains. Tukey Test was used to analyze the data.

| Strains                 | WAP-8294A1 |                    |                 | WAP-8294A2 |                |                | WAP-8294A4 |                 |                 |
|-------------------------|------------|--------------------|-----------------|------------|----------------|----------------|------------|-----------------|-----------------|
|                         | Mean       | 5% SL <sup>α</sup> | 1% SL           | Mean       | 5% SL          | 1% SL          | Mean       | 5% SL           | 1% SL           |
| WT                      | 1.0000     | b <sup>β</sup>     | BC <sup>γ</sup> | 1.0000     | c <sup>β</sup> | B <sup>γ</sup> | 1.0000     | bc <sup>β</sup> | BC <sup>γ</sup> |
| ΔWAPS1                  | 0.0000     | c                  | C               | 0.0000     | d              | C              | 0.0000     | c               | C               |
| dCas9-ω3                | 1.6267     | b                  | B               | 1.3433     | b              | B              | 2.4767     | b               | B               |
| dCas9-ω3/<br>refactored | 6.1167     | a                  | A               | 4.3567     | a              | A              | 9.4267     | a               | A               |

<sup>α</sup>Significance Level; <sup>β</sup>the lowercase letters indicate the *P* value < 0.05 between WT and the other strains, when their letters are different from that of WT; <sup>γ</sup>the capital letters indicate the *P* value < 0.01 between WT and the other strains, when their letters are different from that of WT.

**Table S7.** Statistics of the LC-MS peak areas of WAP-8294A compounds extracted from the extracellular fractions of various *Lysobacter* strains. Tukey Test was used to analyze the data.

| Strains                 | WAP-8294A1 |                       |                | WAP-8294A2 |                |                | WAP-8294A4 |                |                |
|-------------------------|------------|-----------------------|----------------|------------|----------------|----------------|------------|----------------|----------------|
|                         | Mean       | 5%<br>SL <sup>α</sup> | 1%<br>SL       | Mean       | 5%<br>SL       | 1%<br>SL       | Mean       | 5%<br>SL       | 1%<br>SL       |
| WT                      | 1.0000     | c <sup>β</sup>        | C <sup>γ</sup> | 1.0000     | c <sup>β</sup> | B <sup>γ</sup> | 1.0000     | c <sup>β</sup> | C <sup>γ</sup> |
| dCas9-ω3                | 3.6367     | b                     | B              | 1.6900     | b              | B              | 3.2000     | b              | B              |
| dCas9-ω3/<br>refactored | 6.1067     | a                     | A              | 4.1067     | a              | A              | 6.7933     | a              | A              |
| WT/<br>refactored       | 1.1067     | c                     | C              | 1.2967     | bc             | B              | 1.4933     | c              | C              |

<sup>α</sup>Significance Level; <sup>β</sup>the lowercase letters indicate the *P* value < 0.05 between WT and the other strains, when their letters are different from that of WT; <sup>γ</sup>the capital letters indicate the *P* value < 0.01 between WT and the other strains, when their letters are different from that of WT.

**Table S8.** Statistics of the LC-MS peak areas of WAP-8294A compounds extracted from the intracellular fractions of various *Lysobacter* strains. Tukey Test was used to analyze the data.

| Strains                 | WAP-8294A1 |                       |                 | WAP-8294A2 |                |                | WAP-8294A4 |                |                |
|-------------------------|------------|-----------------------|-----------------|------------|----------------|----------------|------------|----------------|----------------|
|                         | Mean       | 5%<br>SL <sup>α</sup> | 1%<br>SL        | Mean       | 5%<br>SL       | 1%<br>SL       | Mean       | 5%<br>SL       | 1%<br>SL       |
| WT                      | 1.0000     | c <sup>β</sup>        | BC <sup>γ</sup> | 1.0000     | b <sup>β</sup> | B <sup>γ</sup> | 1.0000     | c <sup>β</sup> | C <sup>γ</sup> |
| dCas9-ω3                | 2.1933     | b                     | B               | 1.1500     | b              | B              | 1.5033     | b              | B              |
| dCas9-ω3/<br>refactored | 3.8233     | a                     | A               | 2.2400     | a              | A              | 2.9000     | a              | A              |
| WT/<br>refactored       | 0.6233     | c                     | C               | 0.6167     | c              | B              | 0.6500     | d              | C              |

<sup>α</sup>Significance Level; <sup>β</sup>the lowercase letters indicate the *P* value < 0.05 between WT and the other strains, when their letters are different from that of WT; <sup>γ</sup>the capital letters indicate the *P* value < 0.01 between WT and the other strains, when their letters are different from that of WT.

**Table S9.** Statistics of the extracellular/intracellular ratios of WAP-8294A compounds in various *Lysobacter* strains. Tukey Test was used to analyze the data.

| Strains                 | WAP-8294A1 |                    |                | WAP-8294A2 |                |                | WAP-8294A4 |                |                |
|-------------------------|------------|--------------------|----------------|------------|----------------|----------------|------------|----------------|----------------|
|                         | Mean       | 5% SL <sup>α</sup> | 1% SL          | Mean       | 5% SL          | 1% SL          | Mean       | 5% SL          | 1% SL          |
| WT                      | 1.1200     | b <sup>β</sup>     | A <sup>γ</sup> | 1.0133     | c <sup>β</sup> | B <sup>γ</sup> | 0.9967     | b <sup>β</sup> | A <sup>γ</sup> |
| dCas9-ω3                | 1.8600     | a                  | A              | 1.6100     | b              | AB             | 2.1433     | a              | A              |
| dCas9-ω3/<br>refactored | 1.7833     | ab                 | A              | 1.8600     | ab             | A              | 2.3333     | a              | A              |
| WT/<br>refactored       | 2.0000     | a                  | A              | 2.1967     | a              | A              | 2.2967     | a              | A              |

<sup>α</sup>Significance Level; <sup>β</sup>the lowercase letters indicate the *P* value < 0.05 between WT and the other strains, when their letters are different from that of WT; <sup>γ</sup>the capital letters indicate the *P* value < 0.01 between WT and the other strains, when their letters are different from that of WT.

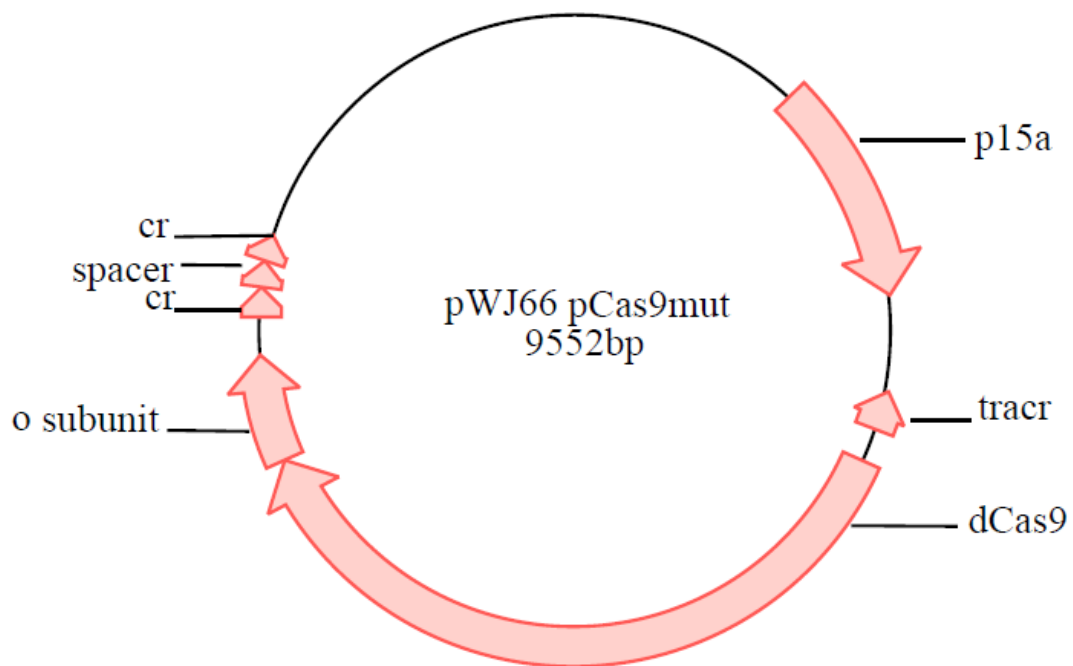

**Figure S1.** Map of plasmid pWJ66, which provides the elements of constructing pB-dCas9-o-cr in gene activation system CRISPR/dCas9- $\omega$  in *L. enzymogenes* OH11<sup>17</sup>. cr, CRISPR RNA; o subunit, omega subunit of RNA polymerase; tracr, trans-activating crRNA.

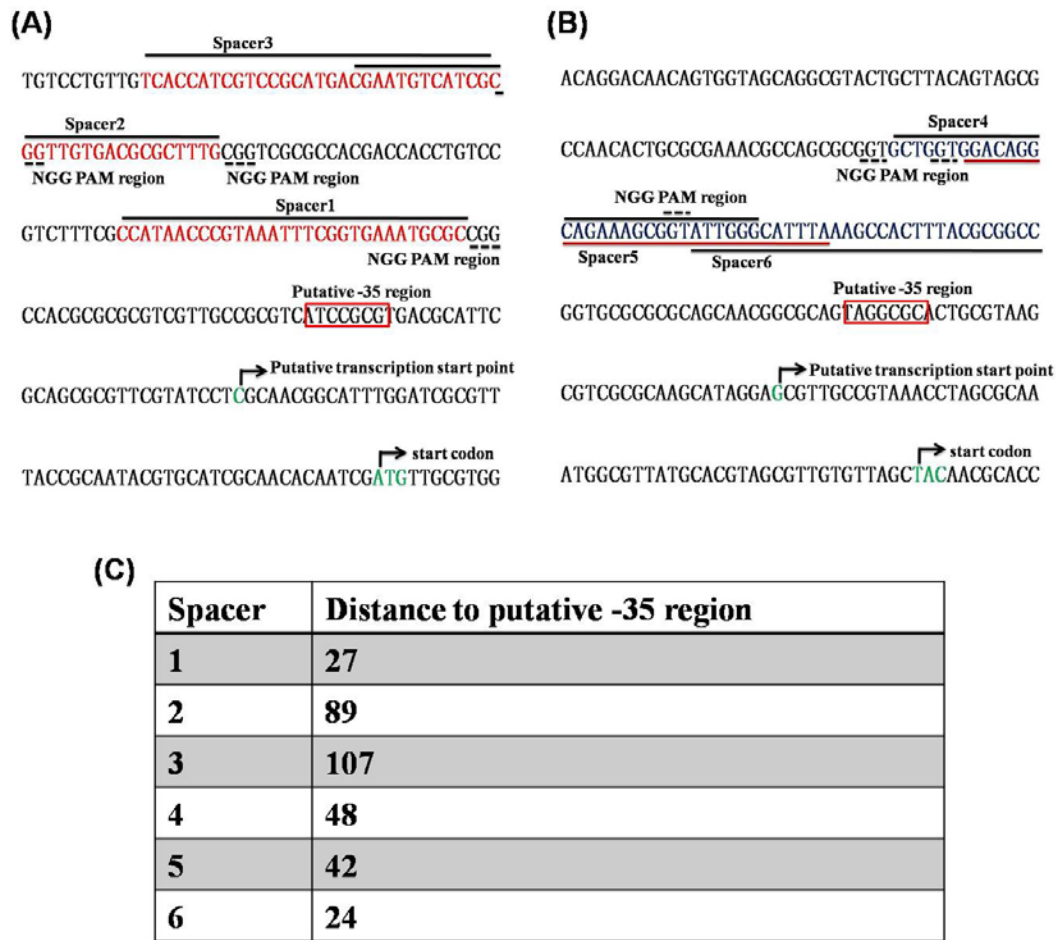

**Figure S2.** The position of the six spacers used in this study. The sequences are located in the upstream promoter of *orf5*. (A) The position of Spacers 1, 2, 3 in the coding strand. (B) The position of Spacers 4, 5, 6 in the non-coding strand. (C) Distance of the six spacers to the putative -35 promoter element. PAM, protospacer-adjacent motif.

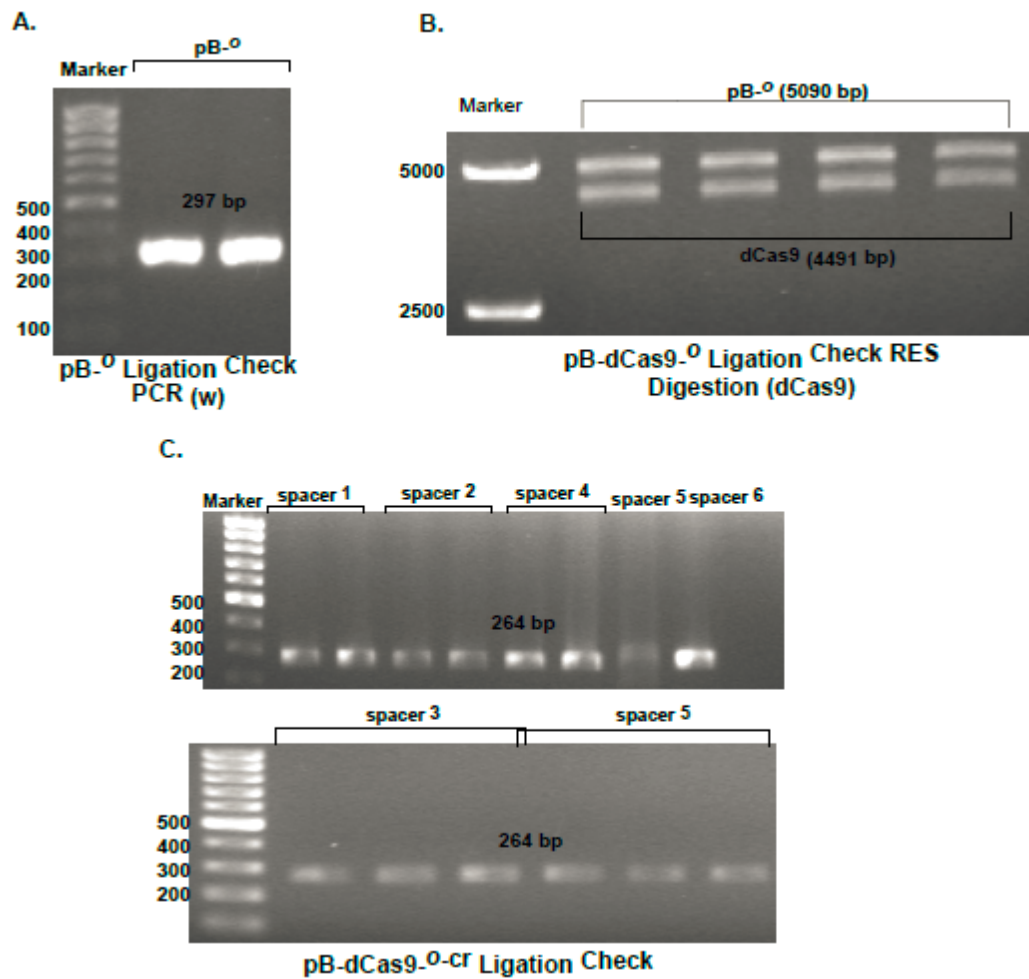

**Figure S3.** Confirmation of CRISPR/dCas9- $\omega$  construct for WAP gene activation in *L. enzymogenes* OH11. (A) Diagnostic PCR of ligation of omega subunit and pBBR1-MCS5 empty vector, expected 297 bp for omega subunit ( $\omega$ ). (B) Double digestion by *ApaI* and *SalI*, expected 4491 bp for dCas9 gene (lower band). (C) Diagnostic PCR of pB-dCas9- $\omega$  and six spacers ligation, expected 264 bp for crRNA (spacers).

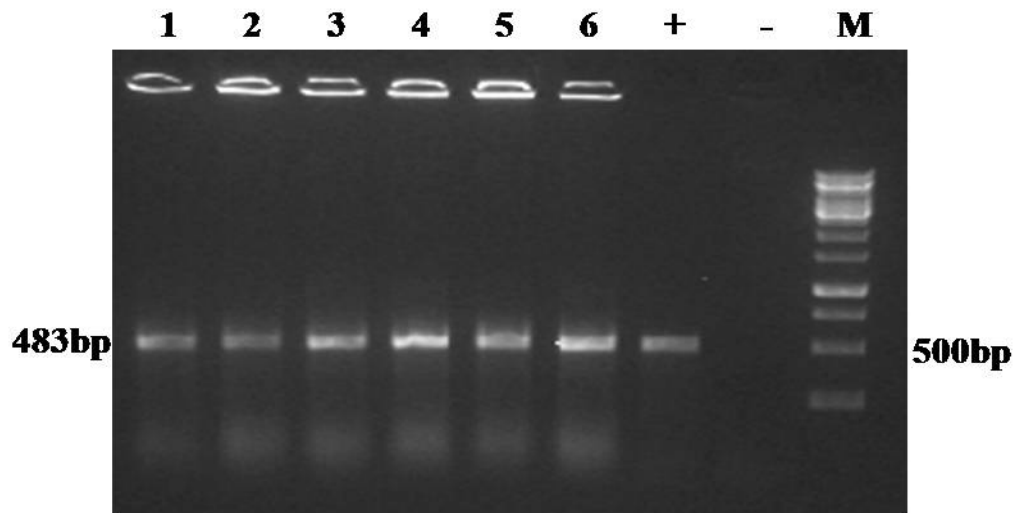

**Figure S4.** PCR verification of dCas9- $\omega$  strains. PCR amplification of gentamicin resistance gene using primers listed in Table S2. 1-6, *L. enzymogenes* OH11 containing each of six pB-dCas9-o-cr vectors. +, positive control, using pBBR1-MCS5 as template. -, negative control, using the gDNA of WT as template. M, 1kb DNA marker.



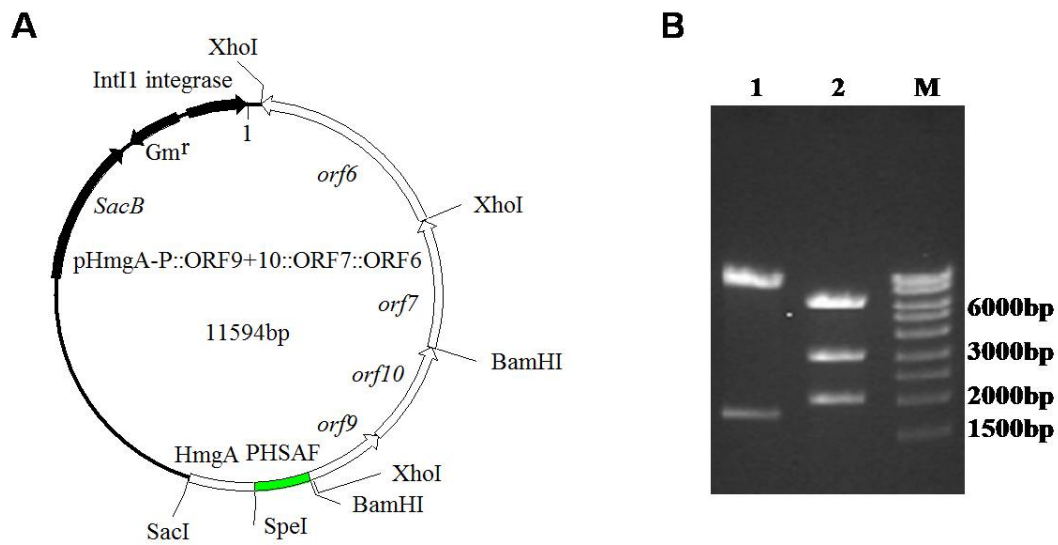

**Figure S5.** Verification of pHmgA-P::WAP. (A) Map of constructed plasmid containing *orf6*, *orf7*, *orf9* and *orf10*. HmgA, a part of gene sequence of *hmgA*; *SacB*, levansucrase encoding gene;  $Gm^r$ , the gentamicin resistance gene. (B) Verification of pHmgA-P::WAP. 1, plasmid treated with *Bam*HI, a product of 1780 bp was expected; 2, plasmid treated with *Xho*I, products of 3004 bp and 2018 bp were expected; M: DNA marker.

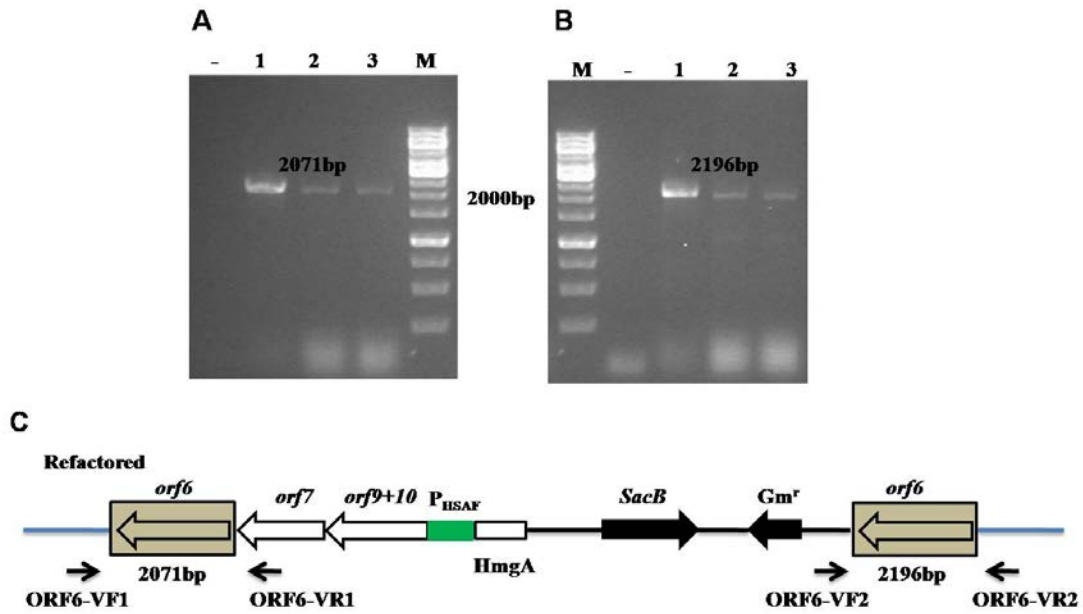

**Figure S6.** PCR verification of engineered strains using primers ORF6-VF1/VR1 (A) and ORF6-VF2/VR2 (B). -, negative control, gDNA of WT was used as template; 1, 2, dCas9- $\omega$ 3/refactored strains; 3, WT/refactored strain; M, 1kb DNA marker. (C) The position of primers ORF6-VF1/VR1 and ORF6-VF2/VR2.

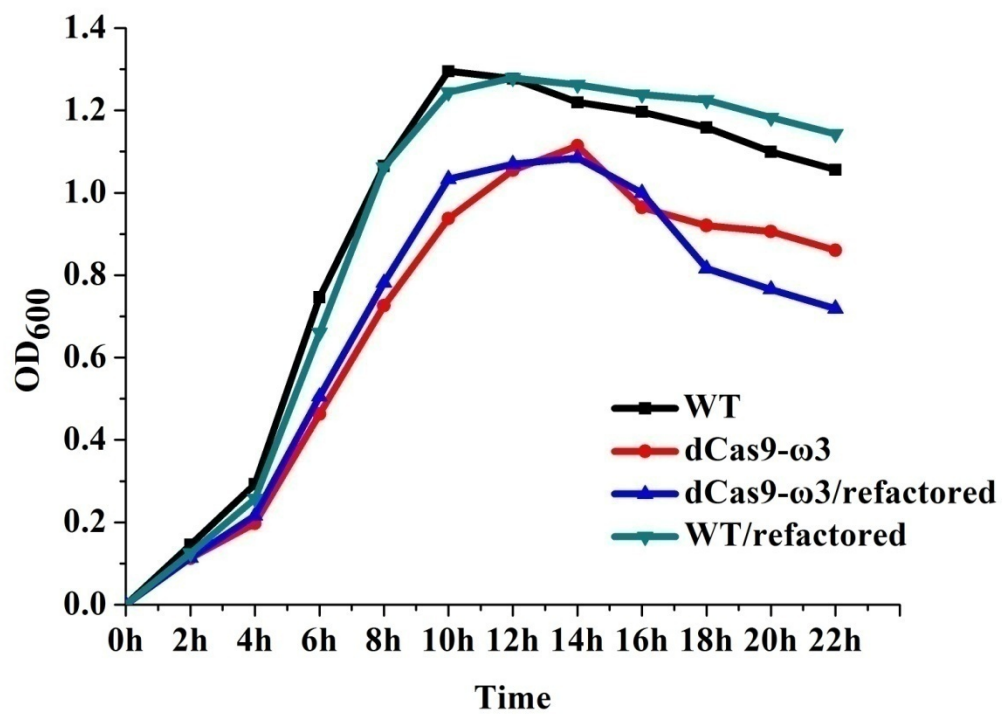

**Figure S7.** The growth curve of WT and engineered strains.

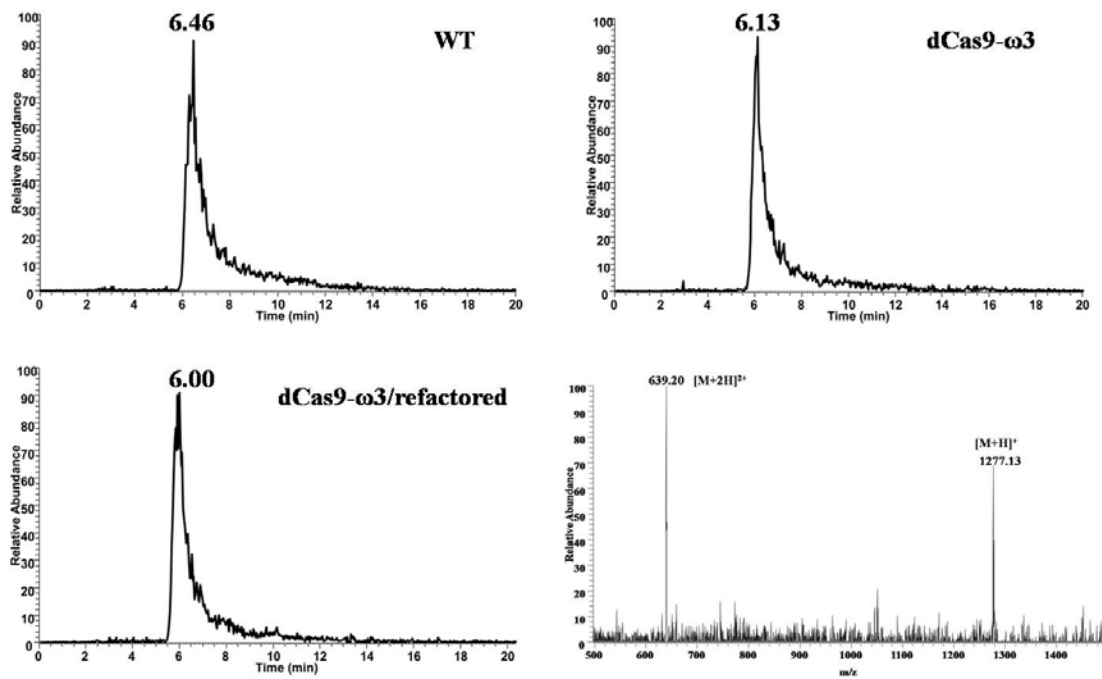

**Figure S8.** EIC (Extracted Ions Chromatograph) of lysobactin (as an external standard for the detection of cyclic peptides) in WT and engineered strains.

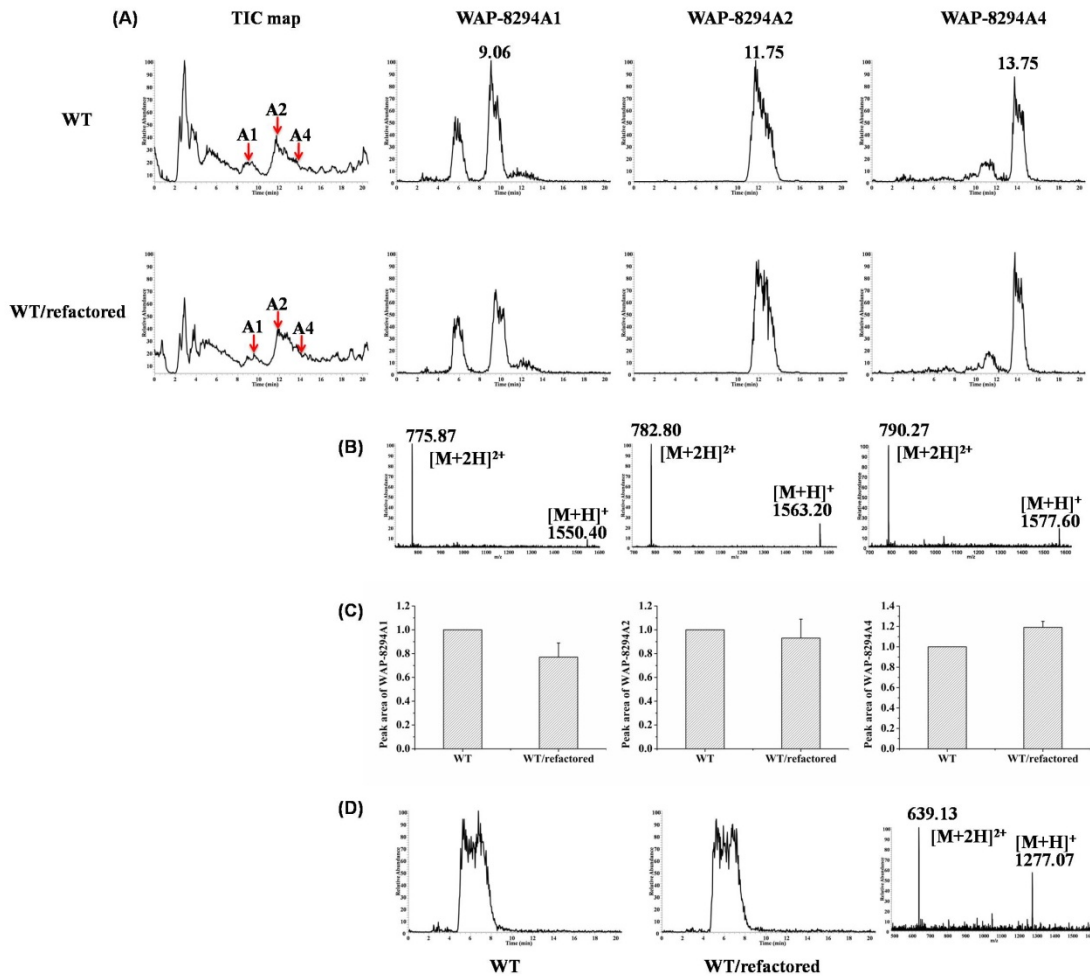

**Figure S9.** Quantification of WAP-8294A compounds by LC-MS. (A) Yield of WAP-8294A1, WAP-8294A2 and WAP-8294A4 in WT and WT/refactored strain. TIC, Total Ions Chromatograph. (B) The  $m/z$  of WAP-8294A1, WAP-8294A2 and WAP-8294A4. (C) Peak area of WAP-8294A compounds in WT and WT/refactored strains. (D) EIC map of lysobactin (as the external standard) in WT and WT/refactored strains.

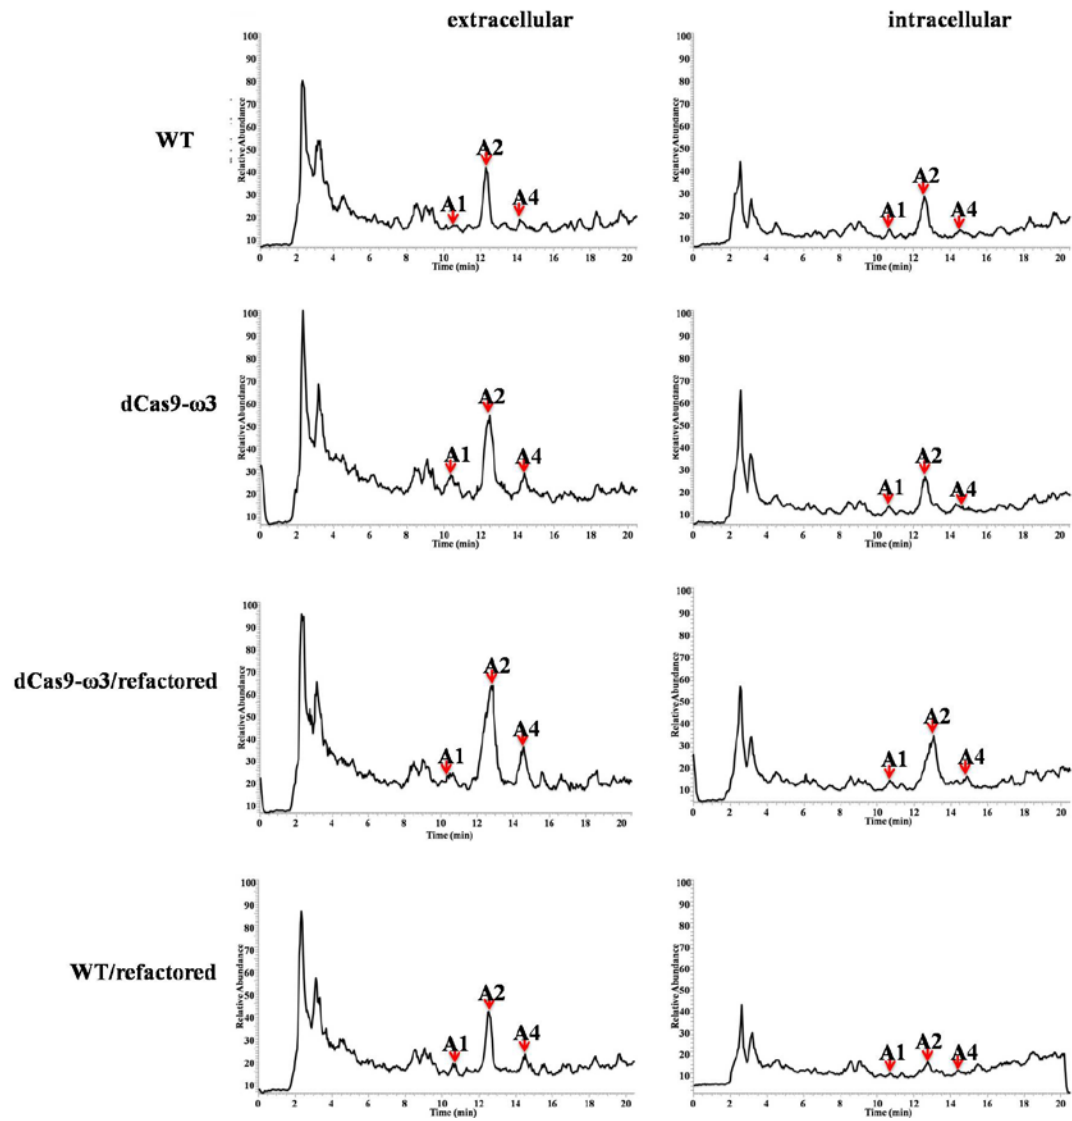

**Figure S10.** Total Ions Chromatograph of extracellular and intracellular WAP-8294A compounds.

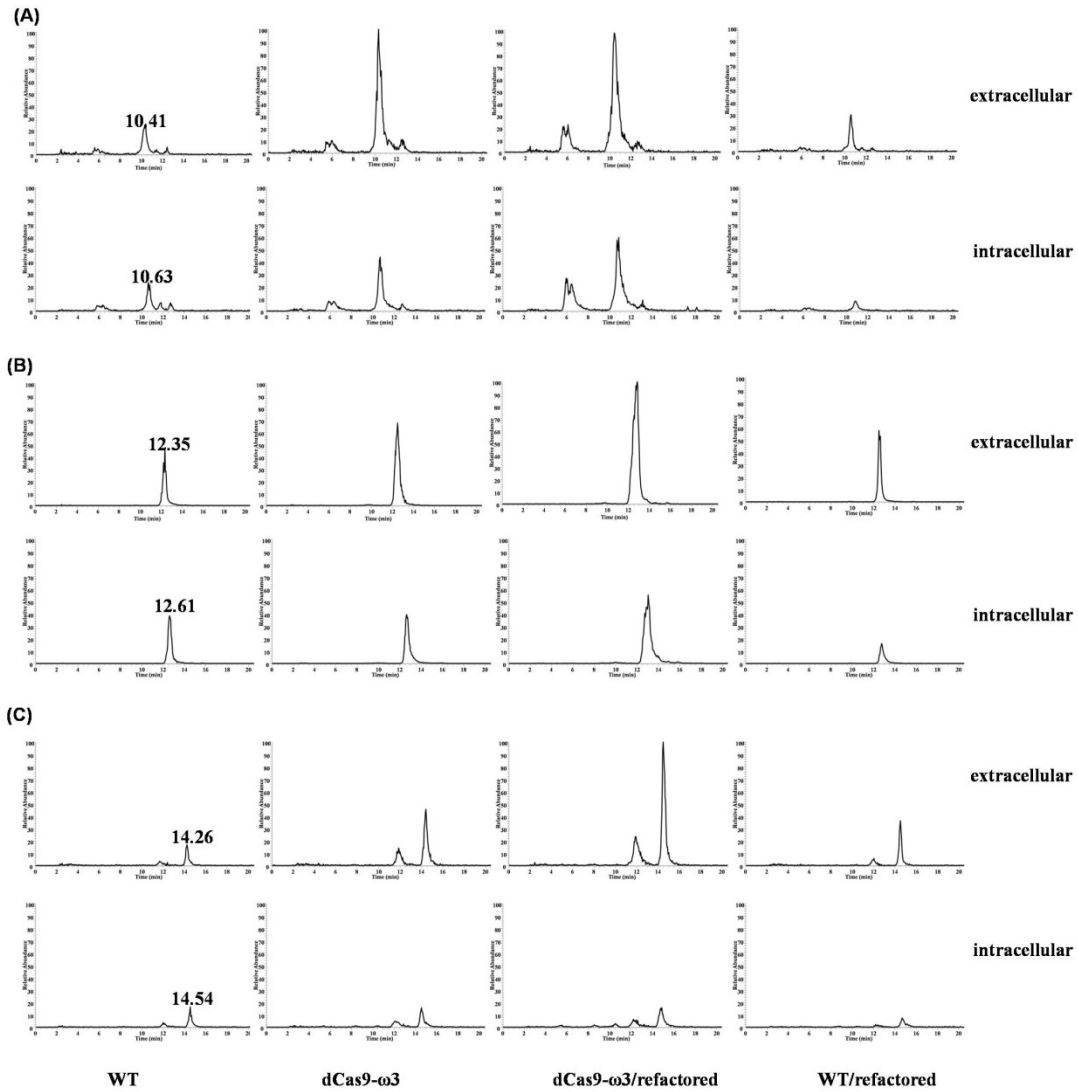

**Figure S11.** The distribution of WAP-8294A1 (A), WAP-8294A2 (B) and WAP-8294A4 (C) in WT and engineered strains. The upper lines represent the extracellular WAP-8294A compounds; the bottom lines represent the intracellular WAP-8294A compounds.

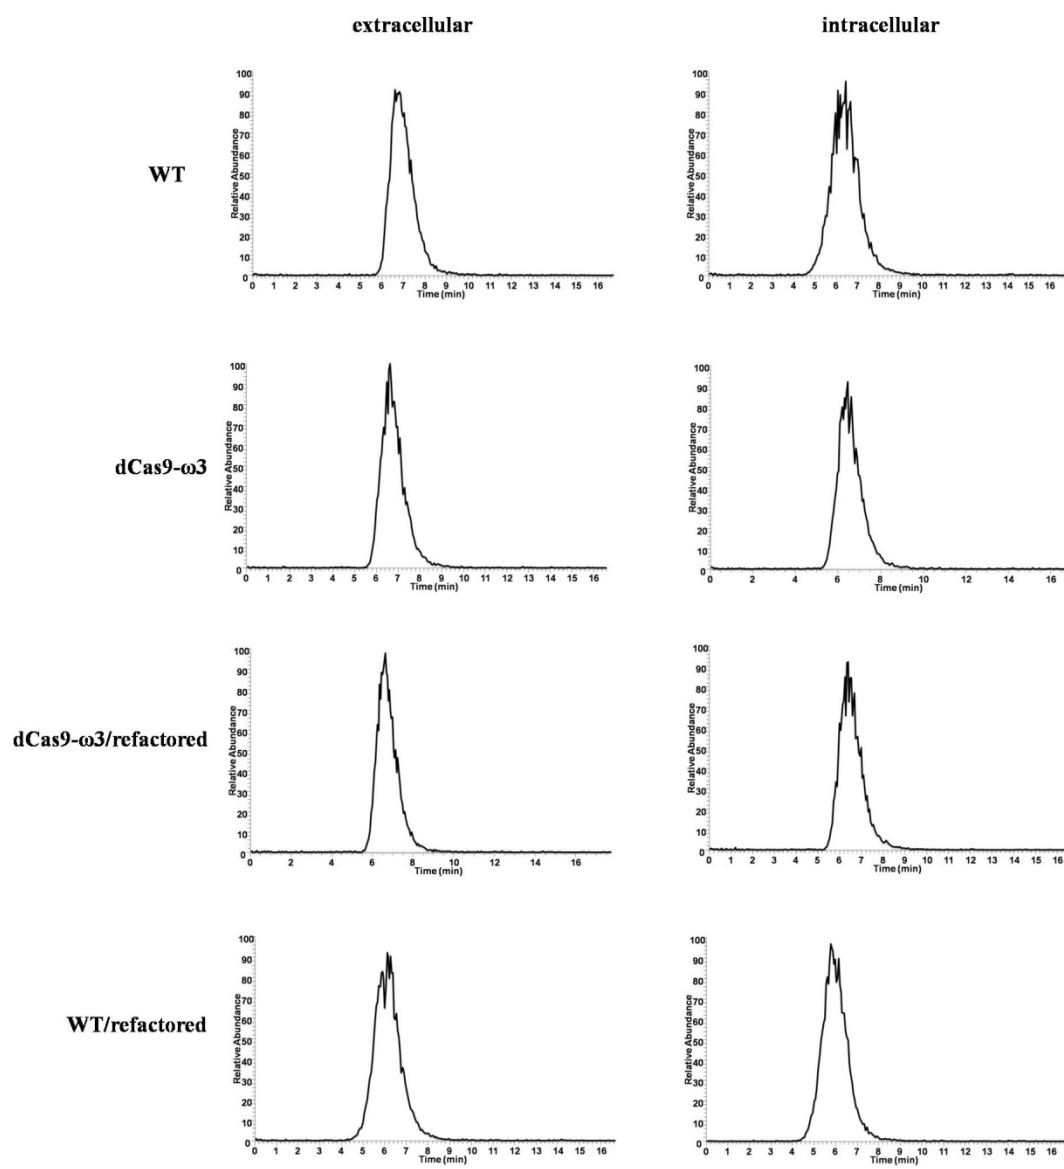

**Figure S12.** EIC of lysobactin (as the external standard) in WT and engineered strains.
